# Supplementary material for: Manufacturing of poly(ethylene glycol diacrylate)-based hollow microvessels using microfluidics
Source: Royal Society of Chemistry journal article supplement (doi:10.1039/c9ra10264g), 2020-01-01
Supplement: c9ra10264g1.pdf [file c9ra10264g1.pdf]

## Electronic Supporting Information (ESI)

### Manufacturing of Hollow Poly(ethylene glycol diacrylate) Microvessels using Photopolymerization Reactions

Saurabh S. Aykar,<sup>a</sup> David E. Reynolds,<sup>a</sup> Marilyn McNamara,<sup>a</sup> and Nicole N. Hashemi<sup>\*ab</sup>

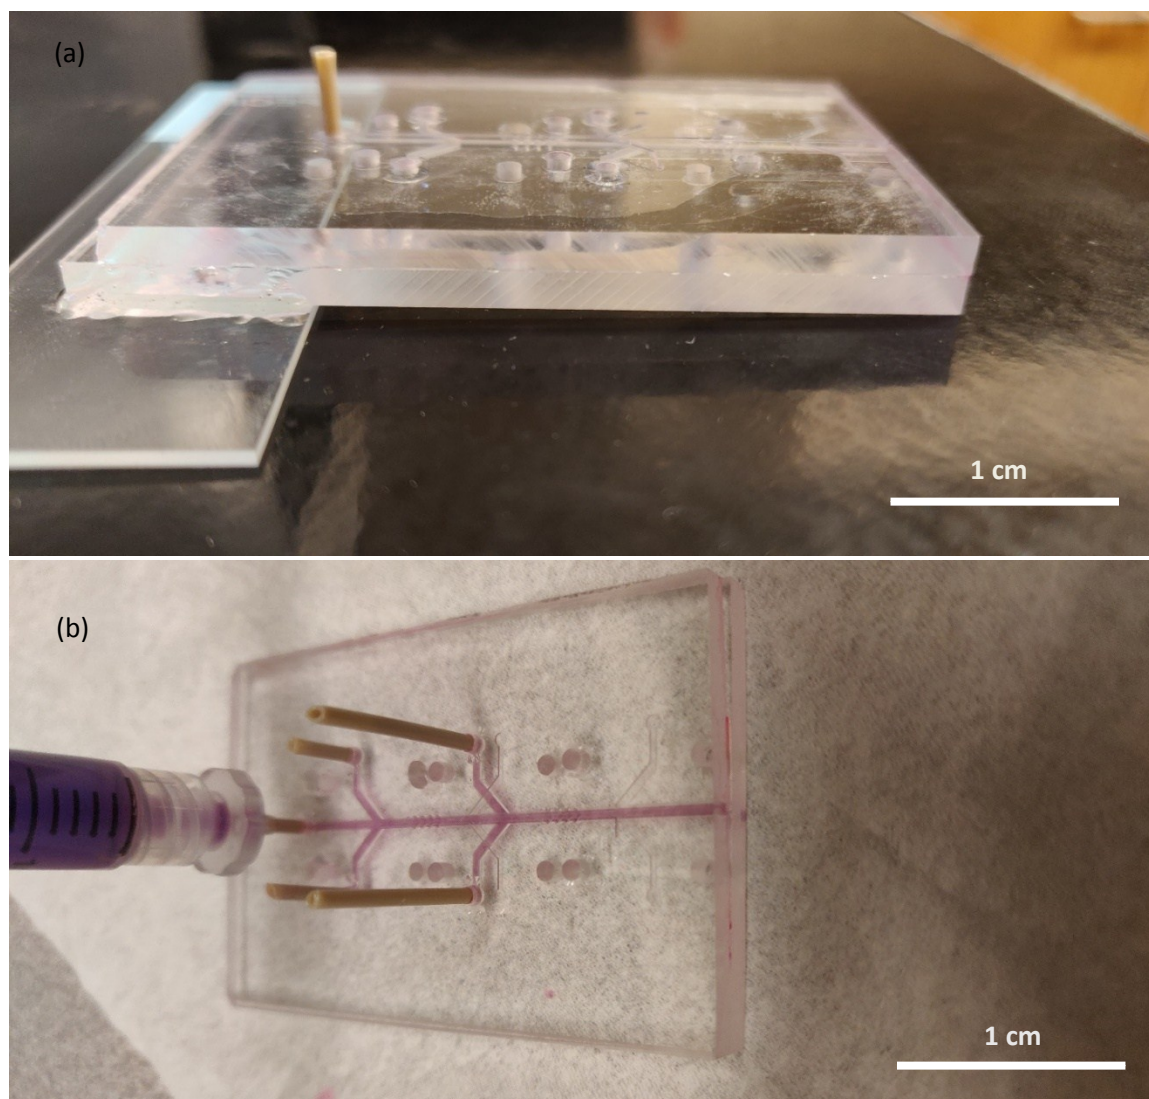

**Figure S1.** (a) Perfectly bonded microfluidic chip having a microfluidic channel milled into it. (b) Leakage test was performed on the bonded microfluidic chip using dyed DI water to check for unbonded parts in the chip.

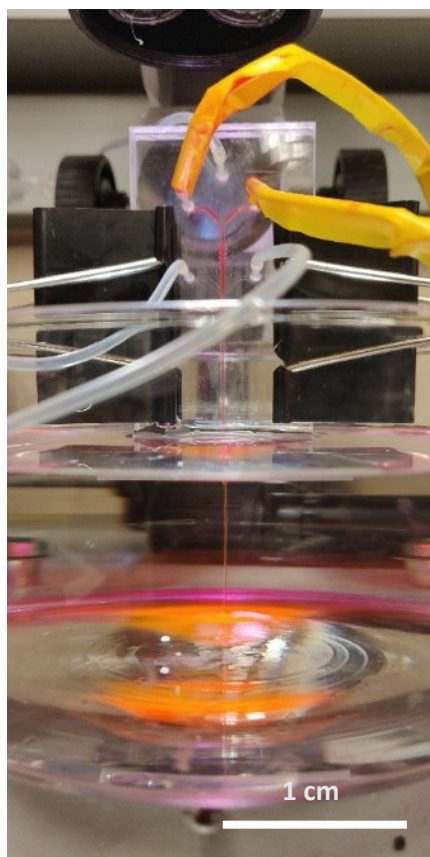

**Figure S2.** Experimental setup of the fabrication of hollow microvessels using photopolymerization. Scale bar is 1 cm.
